# Supplementary material for: Substituted benzoate-anchored decanuclear titanium-oxo clusters featuring an unprecedented defective double-cubane geometry
Source: Royal Society of Chemistry journal article supplement (doi:10.1039/d2ce01653b), 2023-01-01
Supplement: d2ce01653b1.pdf [file d2ce01653b1.pdf]

## Supporting Information

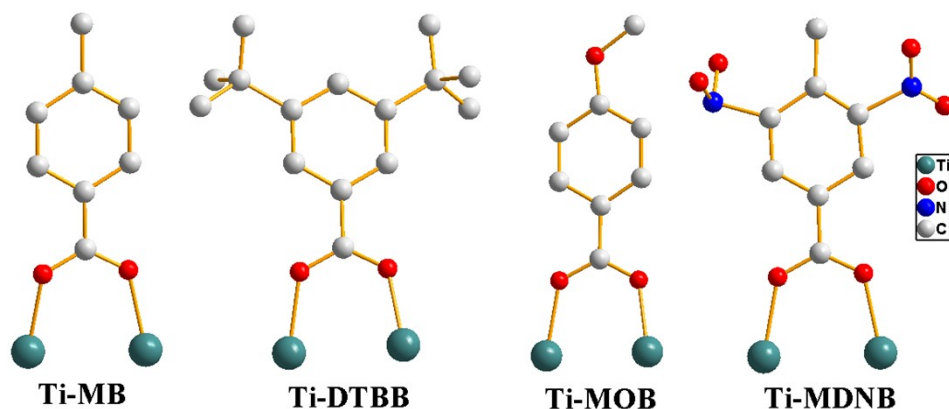

Figure S1. View of the substituted benzoate coordination modes

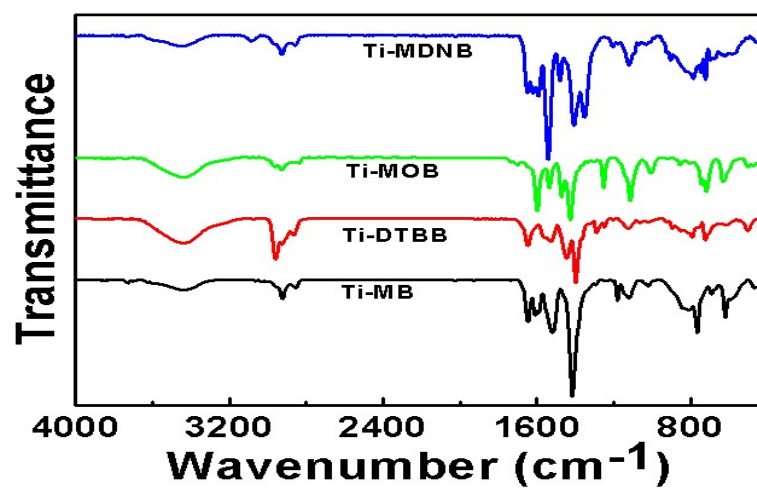

Figure S2. FT-IR spectra for Ti-MB, Ti-DTBB, Ti-MOB and Ti-MDNB

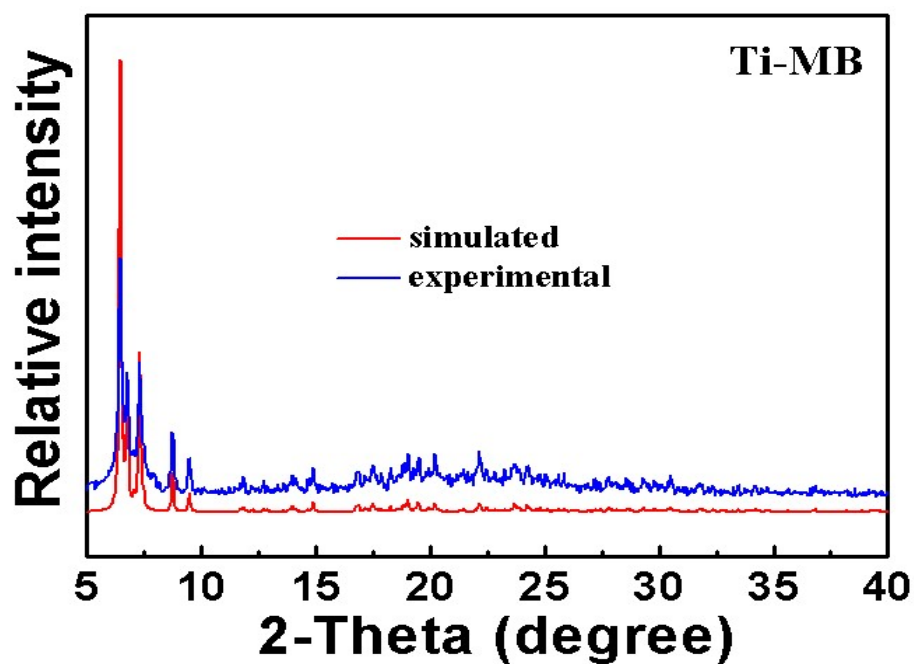

**Figure S3.** The experimental and simulated PXRD patterns for Ti-MB. The top is the experimental pattern, and the bottom is the simulated one.

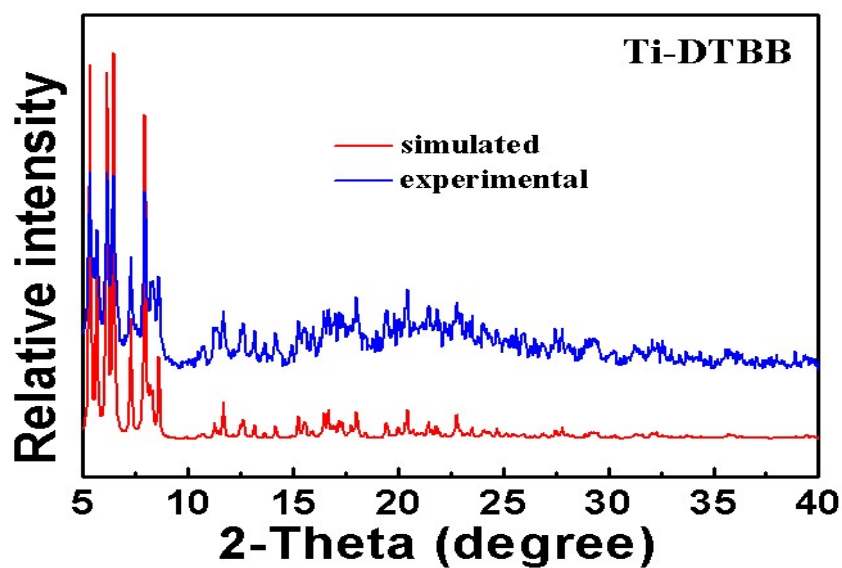

**Figure S4.** The experimental and simulated PXRD patterns for Ti-DTBB. The top is the experimental pattern, and the bottom is the simulated one.

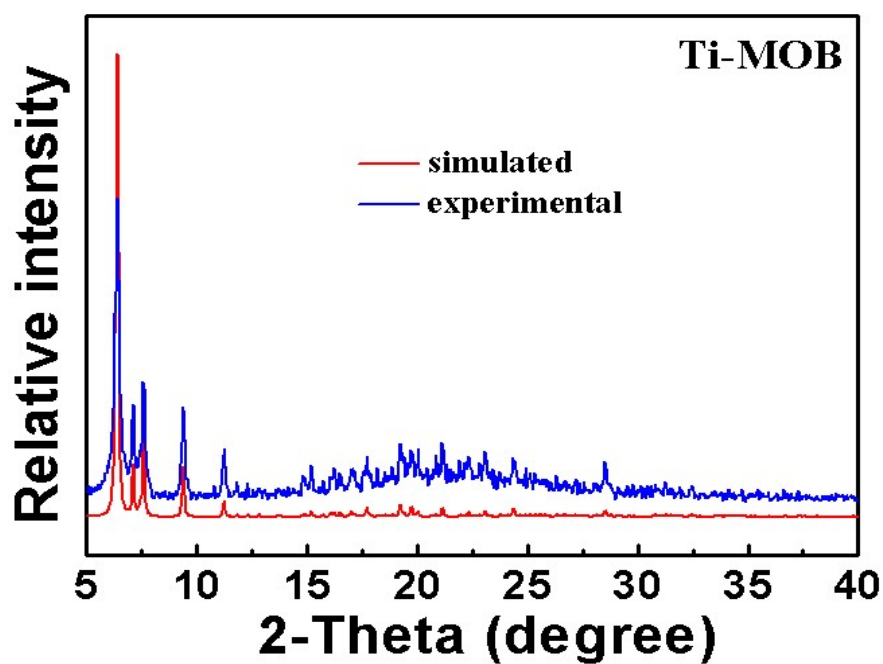

**Figure S5.** The experimental and simulated PXRD patterns for Ti-MOB. The top is the experimental pattern, and the bottom is the simulated one.

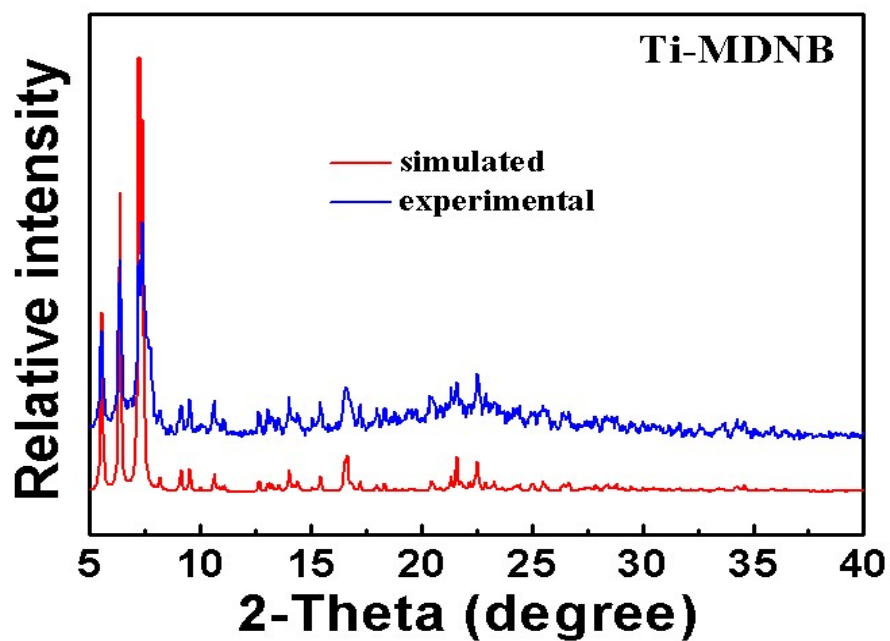

**Figure S6.** The experimental and simulated PXRD patterns for Ti-MDNB. The top is the experimental pattern, and the bottom is the simulated one.

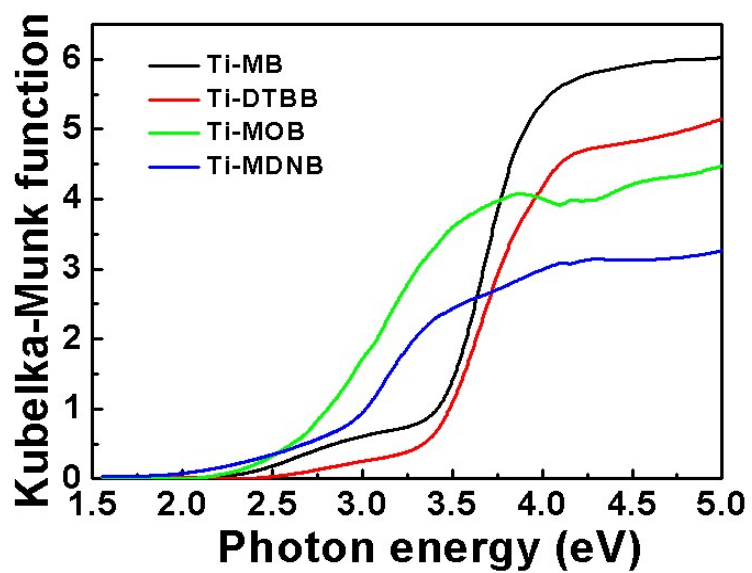

Figure S7. Kubelka-Munk transformation of diffuse reflectance data for for Ti-MB, Ti-DTBB, Ti-MOB and Ti-MDNB

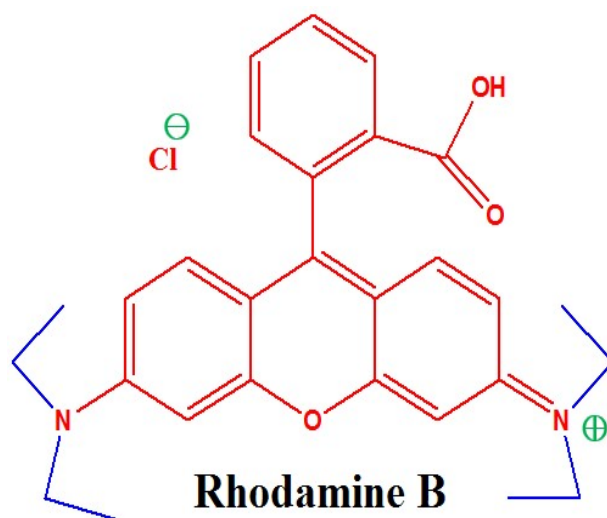

Chart S1. The chemical structure of RhB

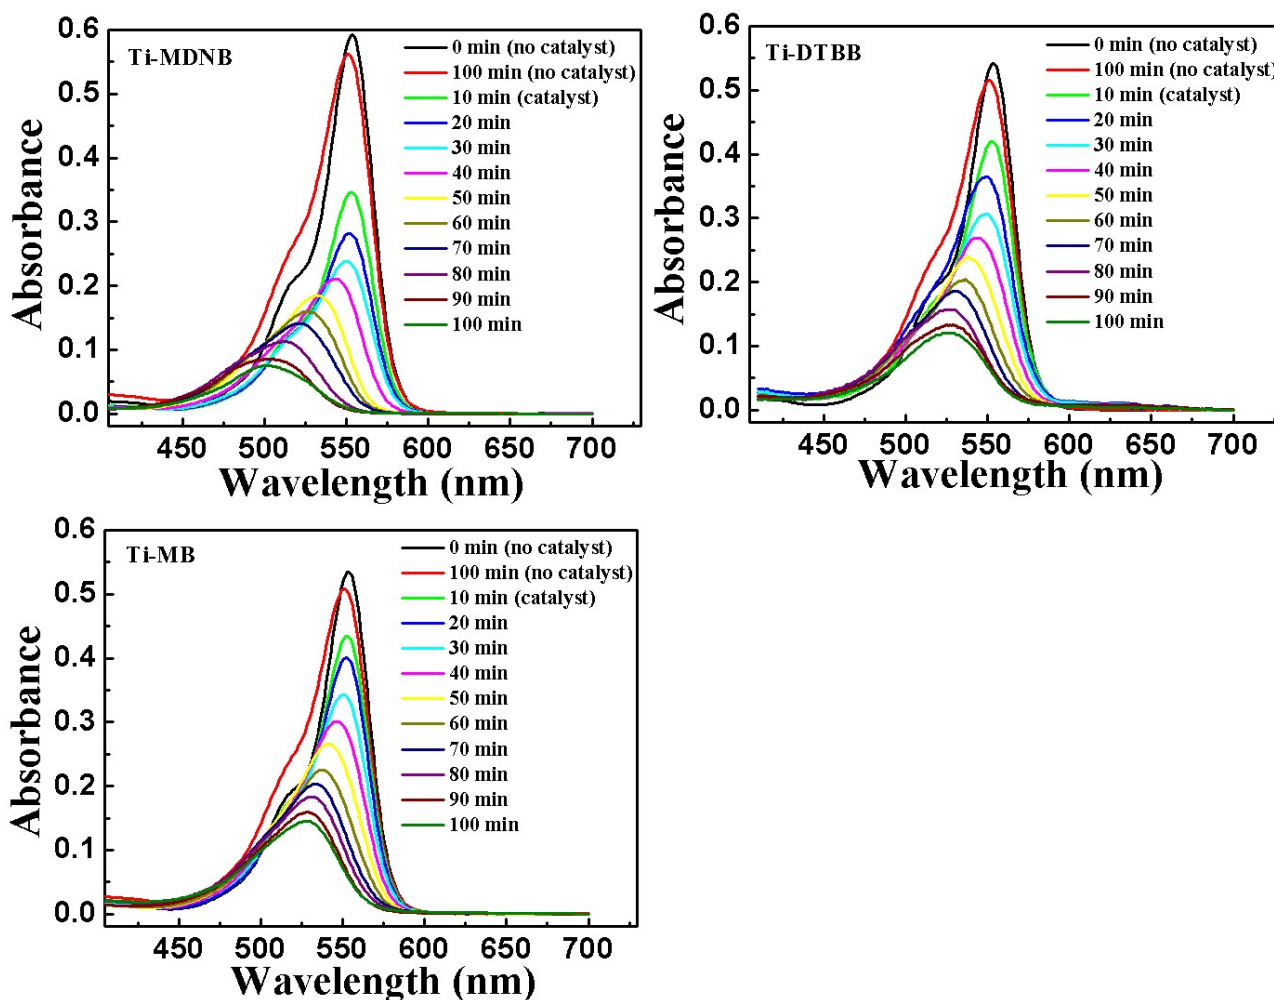

Figure S8. The temporal UV-vis absorption spectrum changes of RhB aqueous solutions for Ti-MDNB, Ti-DTBB and Ti-MB.

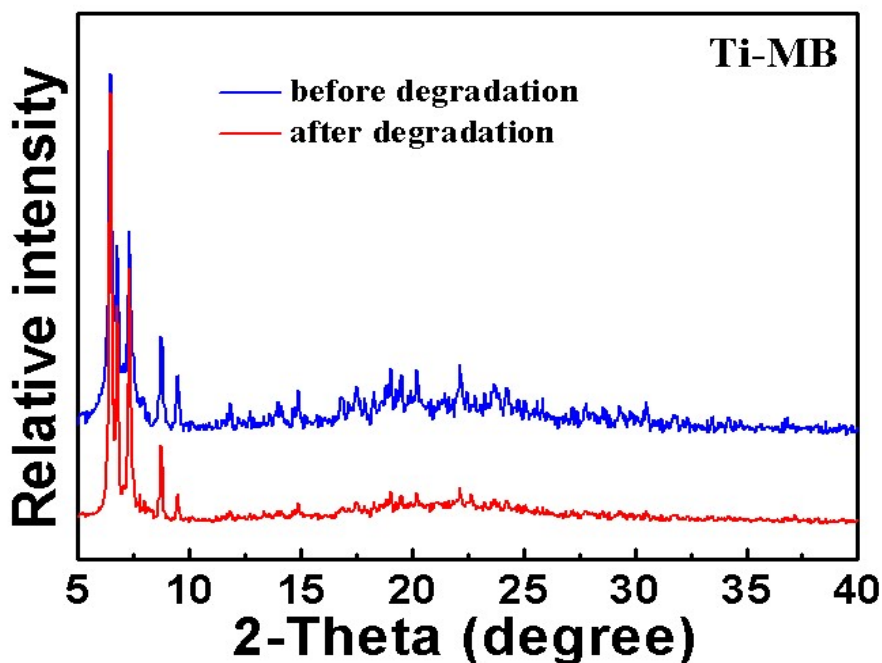

Figure S9. The PXRD patterns of Ti-MB before and after photocatalytic RhB degradation

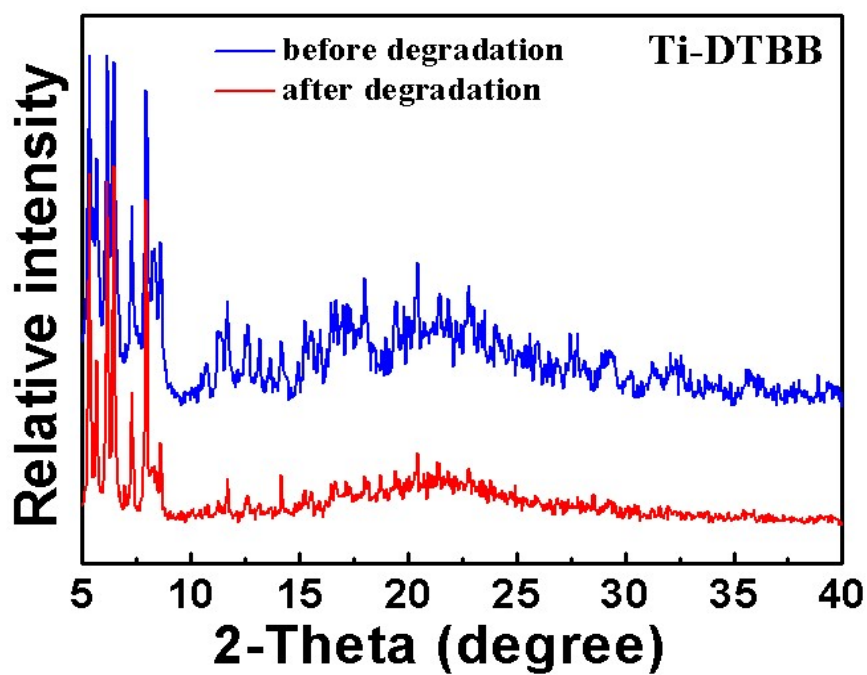

Figure S10. The PXRd patterns of Ti-DTBB before and after photocatalytic RhB degradation

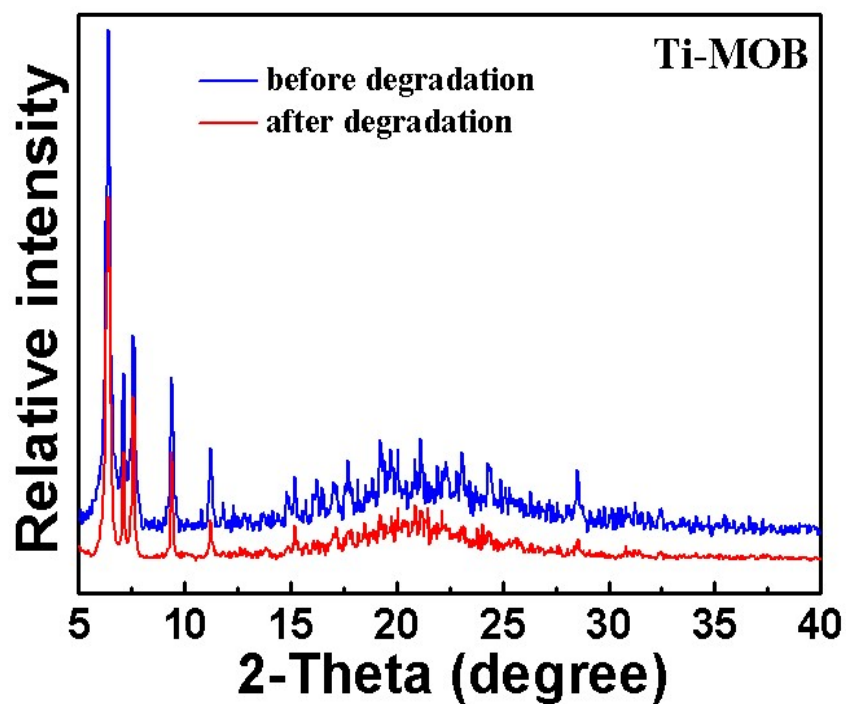

Figure S11. The PXRd patterns of Ti-MOB before and after photocatalytic RhB degradation

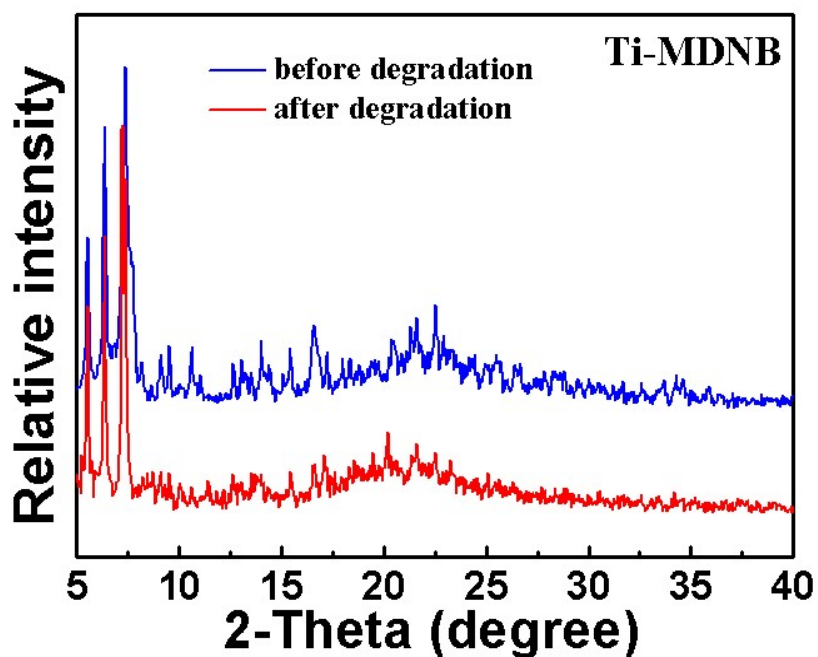

**Figure S12.** The PXRD patterns of Ti-MDNB before and after photocatalytic RhB degradation

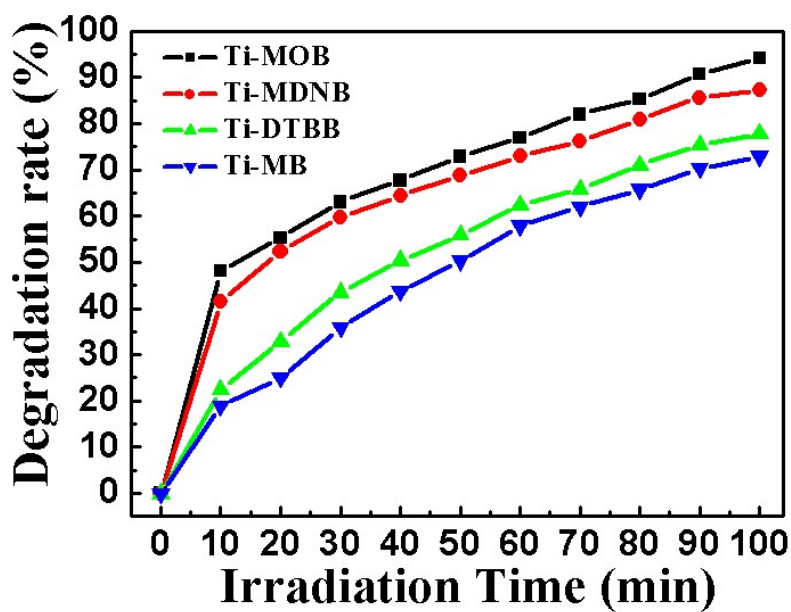

**Figure S13.** Degradation rate of RhB for Ti-MOB, Ti-MDNB, Ti-DTBB and Ti-MB.

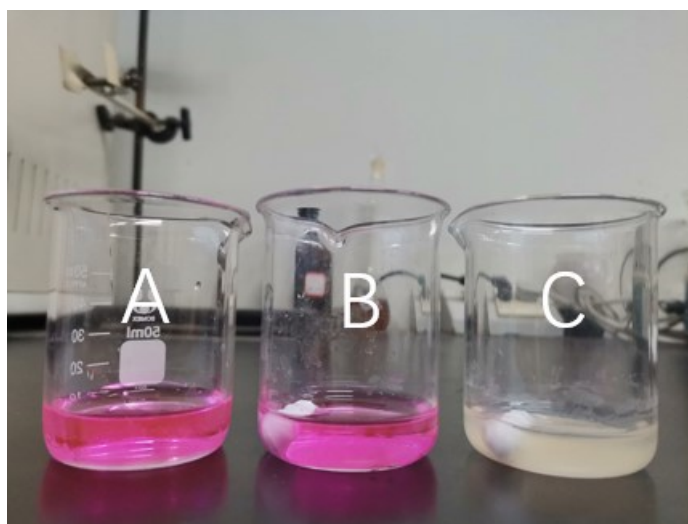

**Figure S14.** Photographs showing the different degradation efficiencies of RhB aqueous solutions ( A: initial RhB aqueous solutions ; B: in the absence of **Ti-MOB** after the irradiation of 100 min; C: in the presence of **Ti-MOB** after the irradiation of 100 min)

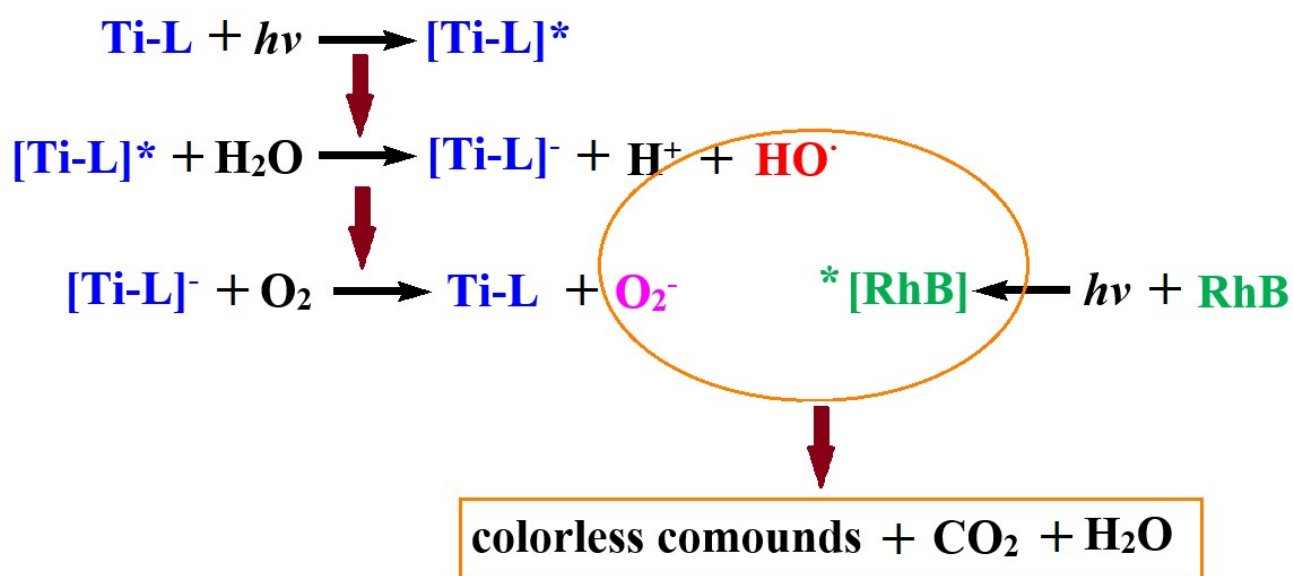

**Figure S15.** The possible photocatalytic degradation mechanism of RhB over Ti-L
